# Supplementary material
Source: publisher figshare collection journal article supplement (https://acs.figshare.com/ndownloader/files/4080097)
Supplement: Supplementary file 1 [file 4080097]

1 Table S1: The glycosylation sites of HRP and the corresponding mass of the  
2 glycopeptides.

|   | Site     | Sequence                                                        | Glycans                                                                  | Mass |
|---|----------|-----------------------------------------------------------------|--------------------------------------------------------------------------|------|
| 1 | 43       | QLTPTFYDNS <b>C(AAVESACPR)</b> PN <sup>#</sup> VSNIVR           | Hex <sub>3</sub> HexNAc <sub>2</sub> dHex <sub>1</sub> Pent <sub>1</sub> | 4224 |
| 2 | 87       | LHFHD <b>C</b> <u>CFVNG<b>C</b></u> DASILLDN <sup>#</sup> TTSFR | Hex <sub>3</sub> HexNAc <sub>2</sub> dHex <sub>1</sub> Pent <sub>1</sub> | 3896 |
|   |          |                                                                 | Hex <sub>4</sub> HexNAc <sub>2</sub> dHex <sub>1</sub> Pent <sub>1</sub> | 4058 |
| 3 | 188      | NVGLN <sup>#</sup> R                                            | Hex <sub>3</sub> HexNAc <sub>2</sub> dHex <sub>1</sub> Pent <sub>1</sub> | 1844 |
| 4 | 216, 228 | LYN <sup>#</sup> FSNTGLPDPTLN <sup>#</sup> TTYLQTLR             | Hex <sub>3</sub> HexNAc <sub>2</sub> dHex <sub>1</sub> Pent <sub>1</sub> | 4986 |
| 5 | 244      | <b>GLC(NOCR)</b> PLNGN <sup>#</sup> LSALVDFDLR                  | Hex <sub>3</sub> HexNAc <sub>2</sub> dHex <sub>1</sub> Pent <sub>1</sub> | 3606 |
| 6 | 285      | GLIQSDQELFSSPN <sup>#</sup> ATDTIPLVR                           | Hex <sub>3</sub> HexNAc <sub>2</sub> dHex <sub>1</sub> Pent <sub>1</sub> | 3673 |
| 7 | 298      | SFAN <sup>#</sup> STQTFNFAFVEAMDR                               | Hex <sub>3</sub> HexNAc <sub>2</sub> dHex <sub>1</sub> Pent <sub>1</sub> | 3356 |
| 8 | 316      | MGN <sup>#</sup> ITPLTGTTGGQIR                                  | Hex <sub>3</sub> HexNAc <sub>2</sub> dHex <sub>1</sub> Pent <sub>1</sub> | 2612 |

3  
4  
5
